# Supplementary material
Source: PubMed Central journal article supplement (PMC4566265)
Supplement: 10.1534_115.179499_genetics.115.179499-2.pdf [file 10.1534_115.179499_genetics.115.179499-2.pdf]

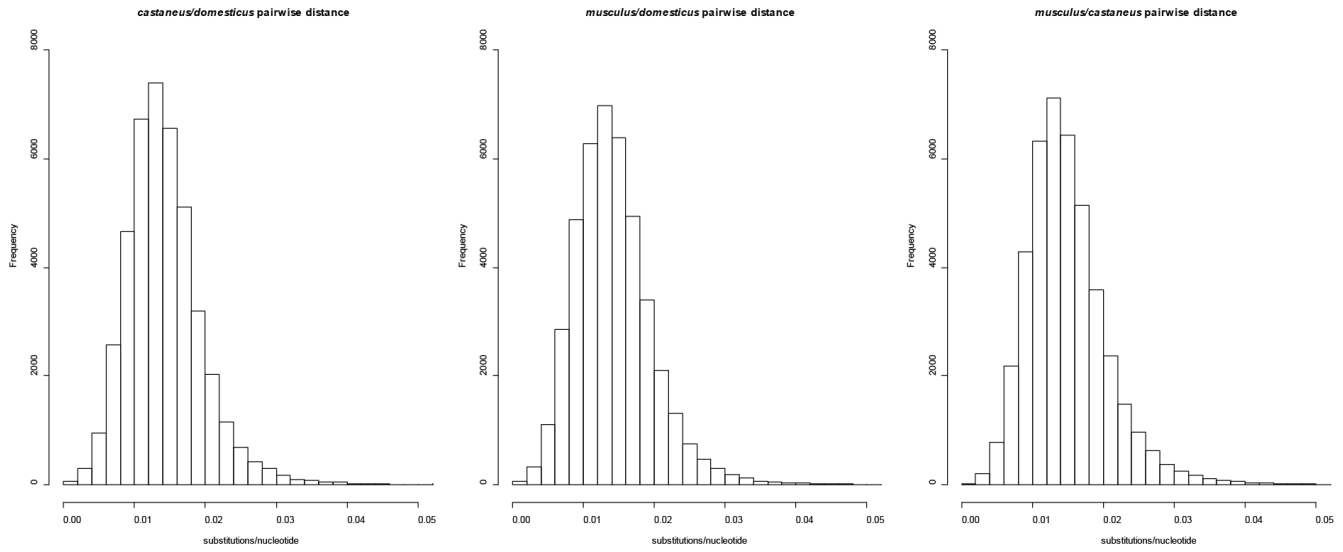

**Figure S1** Distribution of pairwise branch lengths for each subspecies pair across loci. Each count is a pairwise distance from one of the 43,255 gene trees, each a consensus tree from a posterior distribution, from the MrBayes analysis. The similarity between these distributions highlights the near simultaneity of divergence between house mouse subspecies and the limited levels of gene flow.
